# Supplementary material for: Systematic analysis of copy number variation associated with congenital diaphragmatic hernia
Source: PubMed Central journal article supplement — Proc Natl Acad Sci U S A. 2018 Apr 30;115(20):5247–52. doi: 10.1073/pnas.1714885115 (PMC5960281; doi:10.1073/pnas.1714885115), 2018-04-30
Supplement: pnas.1714885115.sapp.pdf [file pnas.1714885115.sapp.pdf]

## SUPPLEMENTARY INFORMATION (SI) APPENDIX for:

### Systematic analysis of copy number variation associated with congenital diaphragmatic hernia

Qihui Zhu<sup>1\*</sup>, Frances A. High<sup>2,3,4\*</sup>, Chengsheng Zhang<sup>1\*</sup>, Eliza Cerveira<sup>1</sup>, Meaghan Russell<sup>2</sup>, Mauro Longoni<sup>2,4</sup>, Maliackal P. Joy<sup>2</sup>, Mallory Ryan<sup>1</sup>, Adam Mil-homens<sup>1</sup>, Lauren Bellfy<sup>1</sup>, Caroline Coletti<sup>2</sup>, Pooja Bhayani<sup>2</sup>, Regis Hila<sup>2</sup>, Jay Wilson<sup>3,4</sup>, Patricia K. Donahoe<sup>2,4\*\*</sup>, Charles Lee<sup>1,5\*\*</sup>

1 The Jackson Laboratory for Genomic Medicine, Farmington, Connecticut 06032,

2 Pediatric Surgical Research Laboratories, Massachusetts General Hospital, Boston, MA 02114

3 Department of Surgery, Boston Children's Hospital, Boston, MA 02115

4 Harvard Medical School, Boston MA 02115

5 Department of Life Sciences, Ewha Womans University, Seoul, South Korea

\*:co-first authors

\*\* : Co-senior authors

**Corresponding Author:** Patricia K. Donahoe

**Email:** pdonahoe@mgh.harvard.edu

**This PDF includes:**

**Supplemental Materials and Methods**

**Figures S1, S2, S3, S4, S5**

**Tables S1, S2, S3, S4, S5, S6**

### Supplemental Materials and Methods

#### ***Custom array CGH design***

Each target region was covered by 9-700 probes with an additional 20 probes outside of the target region. The remaining probes were distributed uniformly across the genome to create a "backbone". Overall, a total of 37,907 probes were placed to cover targeted regions, 2,934 probes to cover flanking regions and 8,170 probes to cover backbones in this array. The average density of the probe coverage was ~51 kb at the genome level, and the average density of targeted region was ~8 kb (0.1-200 kb, Fig. 1B). Array design was tested for reproducibility and quality before use. Overall, this format allowed for the detection of CNVs of 500 bp (or larger) within the 140 targeted genomic regions, CNVs of 6 kb (or larger) flanking 10 kb of a targeted region, and 1.75 Mb (or larger) for the rest of the genome.

#### ***Array Comparative Genomic (aCGH) Hybridization***

For each aCGH hybridization, we aliquoted 500-750 ng of each genomic DNA, of either the experimental sample or the corresponding reference sample (Promega Male or Female), with TE buffer (pH 8.0) in a total volume of 20.2  $\mu$ L. Samples were digested using the aCGH Labeling kit and protocol (Agilent Technologies) and quality was assessed by electrophoresis (1% agarose gel). Samples were then fluorescently labeled using a modified protocol including both the BioPrime Labeling Kit (ThermoFisher) and the Agilent aCGH labeling kit. In this modified procedure, 20  $\mu$ L of 2.5X Random Primer Mix (ThermoFisher) was added to each sample and then denatured at 98°C for 5 minutes. Samples were cooled and mixed with 5  $\mu$ L of 10X dUTP Mix (ThermoFisher), 3  $\mu$ L of either Cy5-dUTP (for the experimental sample) or Cy3-dUTP (for the reference sample), respectively, as well as 1  $\mu$ L of Exo-Klenow (Agilent

Technologies). Labeling reaction conditions, subsequent quality control steps, and review of passing criteria (i.e. specific activity calculations) were followed using the Agilent aCGH protocol. Generally, a specific activity value of greater than 30 pmol dyes per  $\mu\text{g}$  gDNA and a yield greater than 3  $\mu\text{g}$  was considered acceptable. However, in certain situations (e.g. limited stock DNA) this QC criterion could be waived on a case-by-case basis. For hybridization, 9.5  $\mu\text{L}$  of labeled experimental gDNA was combined with 9.5  $\mu\text{L}$  of reference gDNA, 5  $\mu\text{g}$  of human Cot-1 DNA (CHIMERx), 6  $\mu\text{L}$  of 10X blocking agent (Agilent Oligo aCGH Hybridization Kit), and 30  $\mu\text{L}$  of 2X hybridization buffer (Agilent Technologies) in a final volume of 60  $\mu\text{L}$ . Hybridization reaction conditions were followed by the Agilent aCGH protocol. Following hybridization, the arrays were washed using either the standard or extended washing protocol as described by Agilent. Arrays were loaded into ozone-protected covers and then scanned using an Agilent G2505C DNA microarray scanner in an ozone-protected hood. The final feature extraction files were used for data analysis.

### ***aCGH data analysis***

The raw data from the scanner were normalized using the Feature Extraction Software version 10.5.1.1 and QC files were manually inspected for quality assurance. aCGH performance was evaluated based on the following QC metrics: derivative  $\log_2$  ratio spread (DLRS<sub>spread</sub>) <0.3; Signal-to-noise ratio (STNR) >30; signal intensity >50 for both the red and the green channels; background noisy <15 and reproducibility < 20. Only arrays that passed the QC parameters continued to further data analysis.

The CNV calling and visualization was performed using Genomic Workbench version 7.0.4.0 and our customized scripts. We applied the Aberration Detection Methods 2 (ADM-2) statistical algorithm. This algorithm finds the change point that maximizes the *t*-test of comparing the averages between change points to 0 (Agilent Technologies). When a segment is kept, it is median centered and the procedure is repeated on the three new segments. This effectively combines the segmentation and calling process into one step. A fuzzy zero method is applied to incorporate quality information about each probe measurement. A threshold with a minimum of 5 consecutive probes, and a log ratio higher than 0.5 for loss or higher than 0.25 for gain was used. We also developed a customized script to compare each call with refseq genes, OMIM genes, Decipher database, common CNVs, etc., and visualize it in a custom-designed user-friendly interface.

The functional enrichment analysis of genes within the significant CNVs was carried out using the Database for Annotation, Visualization and Integrated Discovery (DAVID) (1), and the WebGestalt software (2).  $P < 0.05$  was set as the cut-off. Next, networks of protein-protein interaction involving genes from each functional cluster were constructed using the STRING V10 software (3). For this analysis, we identified any interaction from i) known interaction including experimentally determined and curated databases, ii) predicted interactions including gene neighborhood, gene fusions and gene-concordance, iii) other interactions including text mining, co-expression and protein homology. The minimum required interaction score was set at median confidence  $\geq 0.4$ .

### ***Digital droplet PCR for CNV validation***

Customized primers and probes were designed for each target region using Primer3Plus (4). All primer pairs were tested for their uniqueness across the human genome using the In-Silico PCR component of the UCSC Genome Browser. The ddPCR assays were performed following the Bio-Rad QX200™ system manufacturer's protocol. A total of 10 ng of DNA template was mixed with 2X ddPCR SuperMix for probes (no dUTP) (BioRad), *Hind*III-HF enzyme (2U/reaction) (New England BioLabs), 20X primer/probe (both FAM and HEX-labeled probes), and water to a

final volume of 20  $\mu$ L. Each reaction mixture was then loaded into the sample well of an eight-channel droplet generator cartridge. PCR amplification was performed using a C1000 Touch thermal cycler with the following conditions for CNV detection: enzyme activation at 95°C for 10 minutes, denaturation and extension at 94°C for 30 seconds and 60° C for 1 minute for a total of 40 cycles, enzyme deactivation at 98° C for 10 minutes, finished with a 4° C hold. Once completed, the 96-well PCR plate was loaded on the QX200™ Droplet Reader. All experiments had at least two normal controls (NA12878 and NA10851), and a no-template control (NTC) with water. Analysis of the ddPCR data was performed using the QuantaSoft™ software. Data from any well with less than 8,000 droplets was treated as failed QC and excluded from downstream analysis.

### SI References:

1. Huang DW, Sherman BT, Lempicki RA (2009) Systematic and integrative analysis of large gene lists using DAVID bioinformatics resources. *Nat Protoc* 4(1):44–57.
2. Zhang B, Kirov S, Snoddy J (2005) WebGestalt: an integrated system for exploring gene sets in various biological contexts. *Nucleic Acids Res* 33(suppl 2):W741--W748.
3. Szklarczyk D, et al. (2014) STRING v10: protein--protein interaction networks, integrated over the tree of life. *Nucleic Acids Res*:gku1003.
4. Huang C-C, Orvis GD, Kwan KM, Behringer RR (2014) Lhx1 is required in Müllerian duct epithelium for uterine development. *Dev Biol* 389(2):124–136.

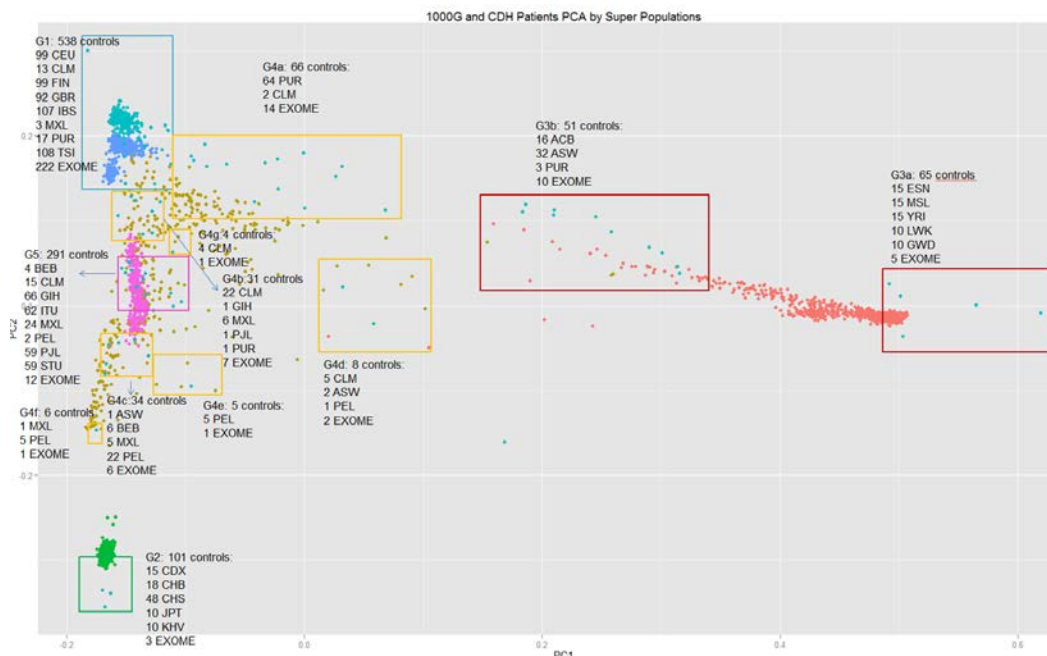

**Fig. S1. Principal component analysis on CDH cohort exomes and 1000 Genomes populations.**

The rectangle boxes indicate samples we selected as controls for our study. Population codes are as follows: CEU: Utah Residents (CEPH) with Northern and Western European Ancestry; CHB: Han Chinese Beijing, China; CHS: Han Chinese South; ACB: African Caribbean in Barbados; ASW: African Ancestry in SW USA; BEB: Bengali in Bangladesh; CDX: Chinese Dai in Xishuangban, China; CLM: Colombian from

Medellin, Colombia; ESN: Esan from Nigeria; FIN: Finnish in Finland; GBR: British from England and Scotland; GIH: Gujarati Indian in TX, USA; GWD: Gambian in Western Division; IBS: Iberian in Spain; ITU: Indian Telugu in the UK; JPT: Japanese in Tokyo, Japan; KHV: Kinh in Ho Chi Minh City, Vietnam; LWK: Luhya in Webuye, Kenya; MSL: Mende in Sierra Leone; MXL: Mexican from LA, USA; PEL: Peruvian in Lima, Peru; PJJ: Punjabi in Lahore, Pakistan; PUR: Puerto Rican from Puerto Rico; STU: Sri Lankan Tamil in UK; TSI: Toscani in Italy; YRI: Yoruba in Ibadan, Nigeria. The numbers before the population codes indicate the number of samples we selected for our study

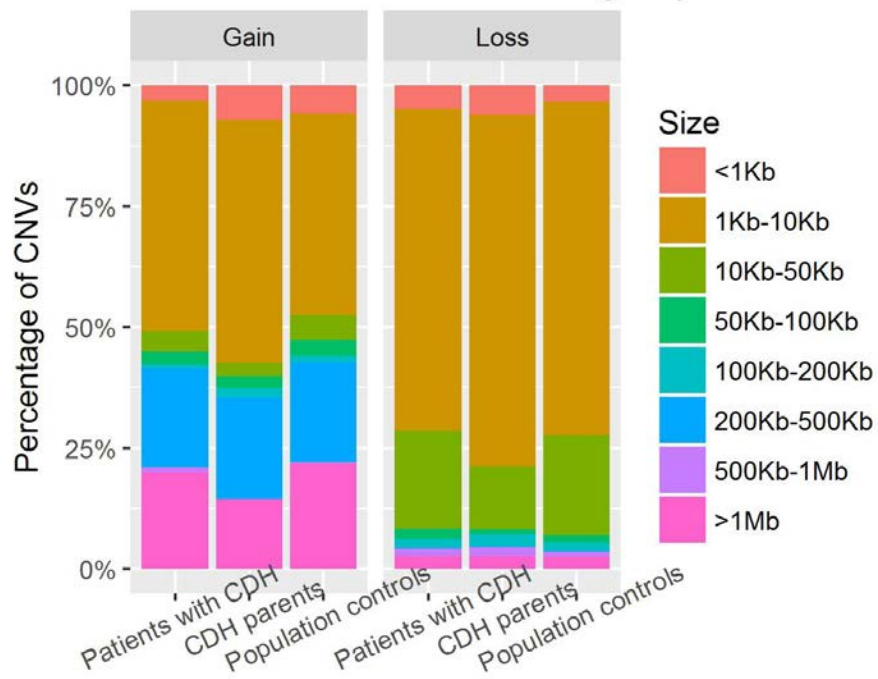

**Fig. S2. CNV size distribution in CDH patients and controls**

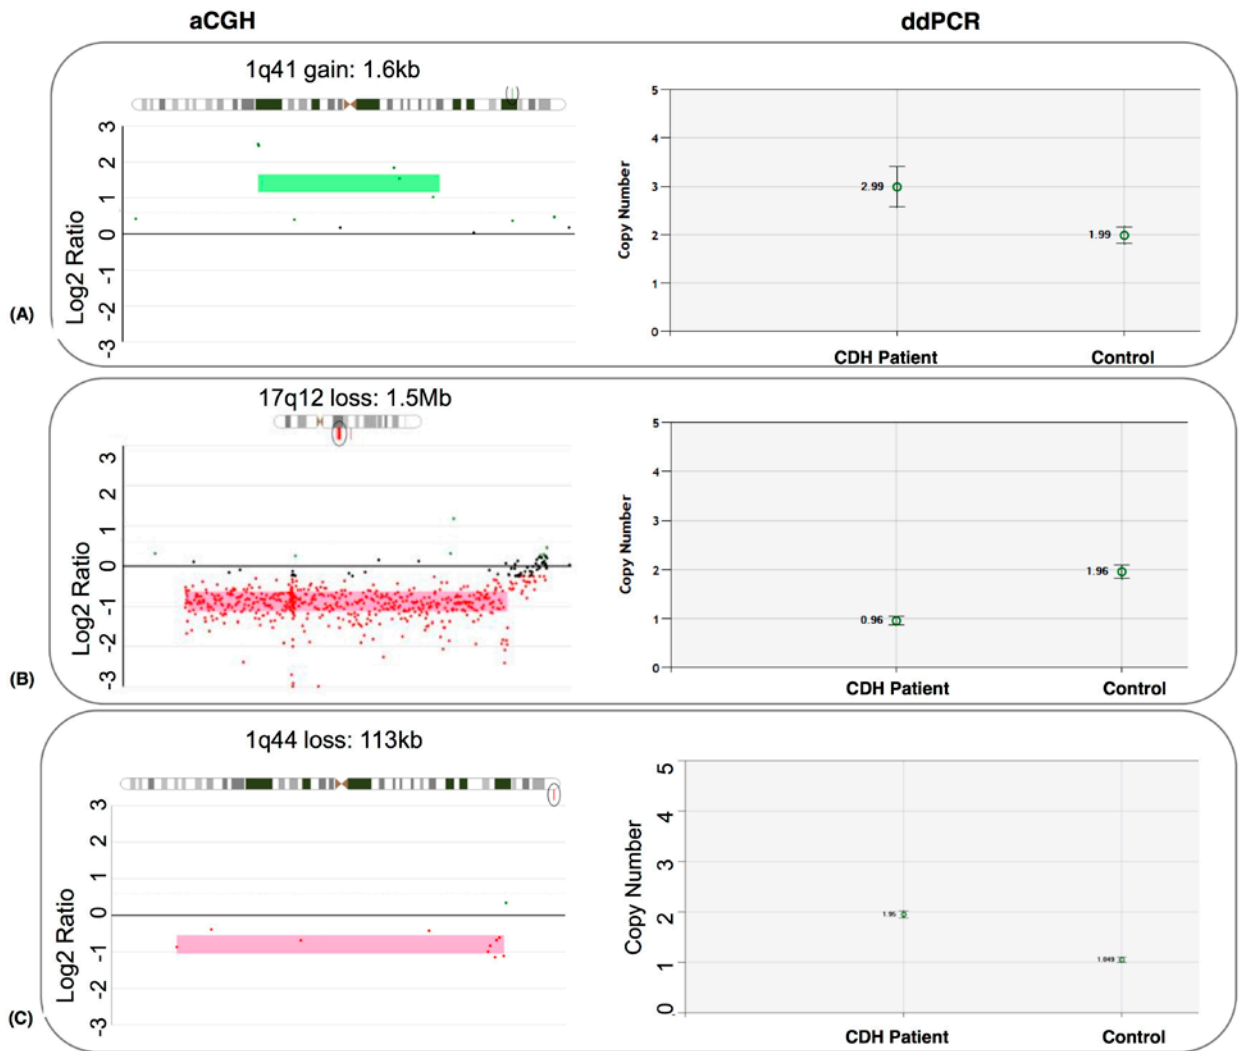

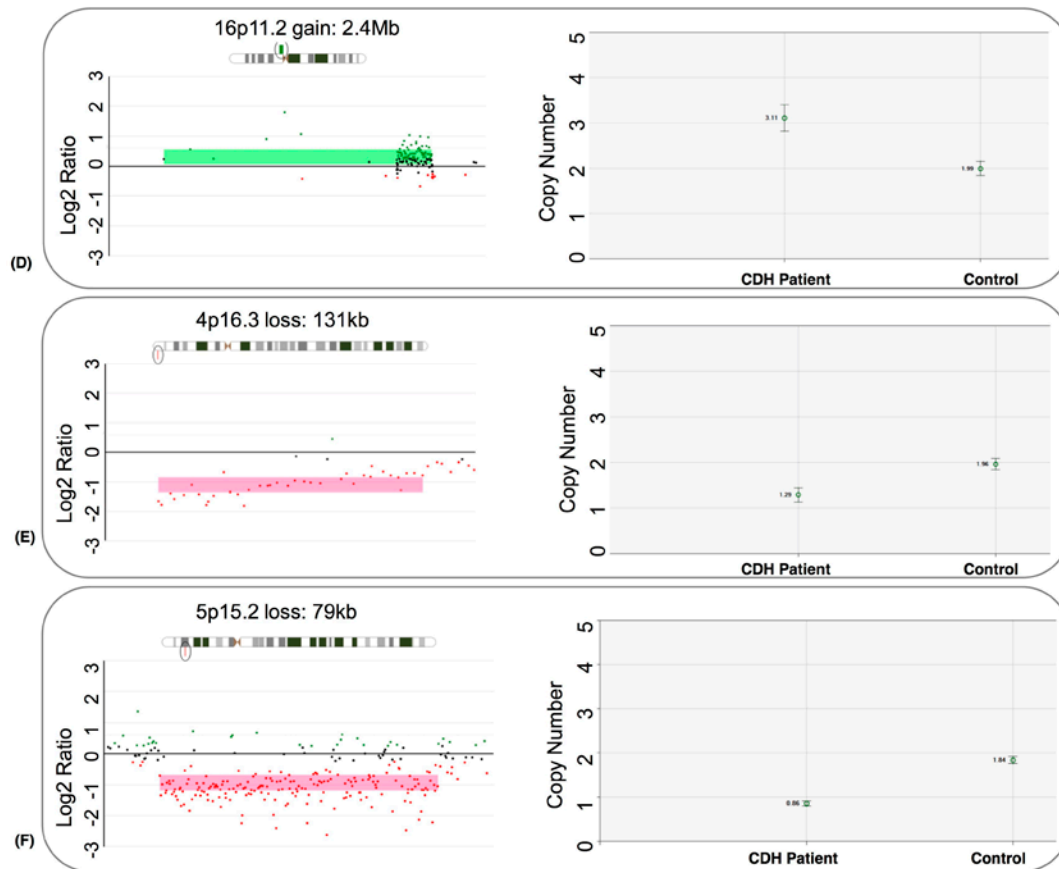

**Fig. S3. Validation of 6 significant CNVs by ddPCR.** The left panel is the aCGH profile. The green rectangle region represents a gain and the red rectangle region indicates a loss. The dots are the probes designed for the customized array. The right panel is the corresponding ddPCR profile. The significant CNVs detected by customized array were able to be successfully validated by ddPCR. A) A 1.6kb copy number (CN) gain at 1q41. B) a 1.5Mb CN loss at 17q12; C) a 113kb CN loss at 1q44; D) A 2.4Mb CN gain at 16p11.2; E) a 131kb CN loss at 4p16.3; and F) a 79kb CN loss at 5p15.2.

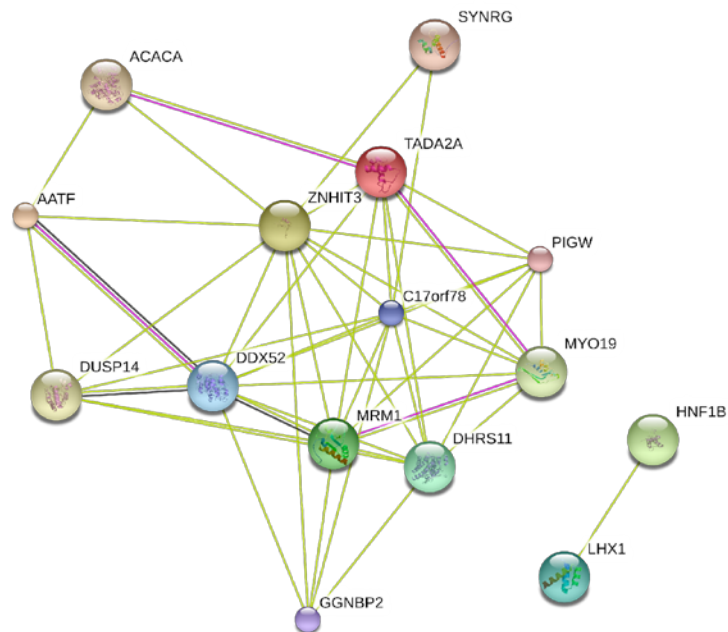

**Fig. S4. Functional interaction network generated by the STRING analysis for the 41 genes in significant CDH-associated CNVs.** 26 genes with known proteins in the STRING database were included in this analysis. 13 genes formed an interaction network (Left side) and another two genes interacted with each other (Right side) with a minimum required interaction score of medium confidence 0.4. Colored nodes represent genes. Small nodes indicate protein of unknown 3D structure and large nodes indicate 3D structure is known or predicted. Colors of the graph edges indicate the types of interaction evidence for relationship between genes: Red line - fusion evidence; Purple line - experimental evidence; Black line - co-expression evidence; Yellow line - text mining evidence.

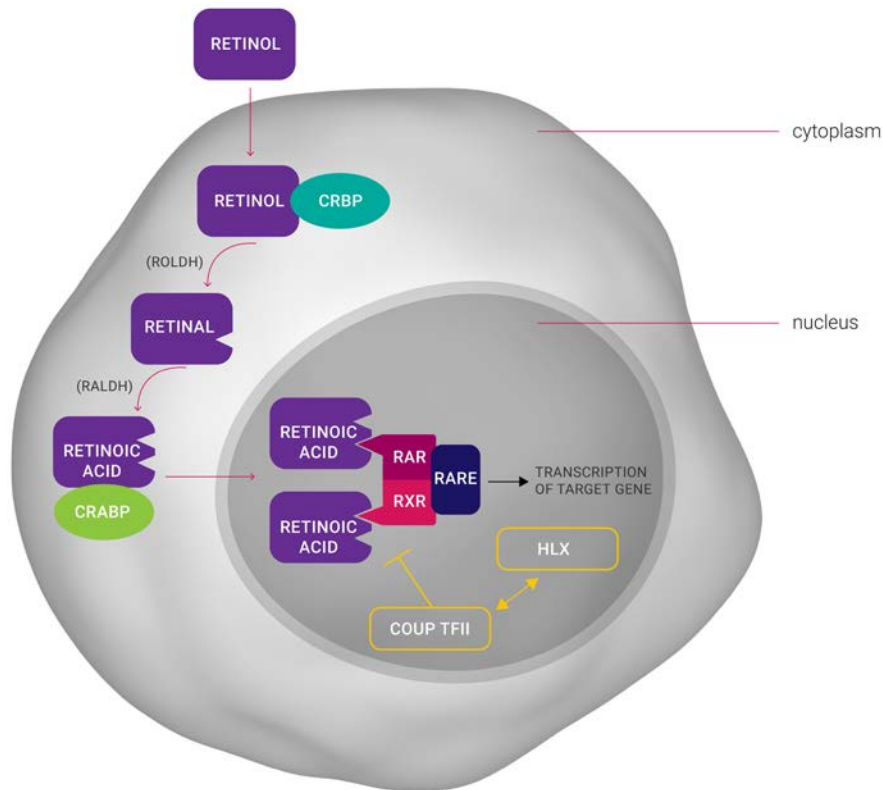

**Fig. S5. Retinoic acid (RA) signaling pathway and CDH candidate genes.** Retinol is taken up from the blood and bound to CRBP (cellular retinol-binding protein) in the cytoplasm. The retinol is converted to retinal by retinol dehydrogenases (ROLDHs), and then retinal is metabolized to RA by the retinaldehyde dehydrogenases (RALDHs). RA is bound in the cytoplasm by CRABP (cellular RA-binding protein). When RA enters the nucleus, it binds to the RA receptors (RARs) and the retinoid X receptors (RXRs), RARs and RXRs heterodimerize and bind to RA-response element (RAREs), which activates transcription of the target gene. *COUP-TFII* can act as a repressor of this pathway by inhibiting the heterodimerisation of RAR/RXR, thus inhibiting gene transcription. *HLX* was predicted to interact with *COUP-TFII* and could modulate the activity of *COUP-TFII* transcription factor, and therefore disturb this pathway.



**Table S1. Clinical information of CDH patients**

| Patient ID | Ethnicity (self-reported) | Sex | CDH SIDE  | CDH TYPE                | Complex CDHUnknown | PHENOTYPE                                                                                                |
|------------|---------------------------|-----|-----------|-------------------------|--------------------|----------------------------------------------------------------------------------------------------------|
| C1         | White                     | M   | left      | Bochdaleck              | NO                 | isolated CDH                                                                                             |
| C2         | White                     | M   | bilateral | Morgagni                | YES                | vascular ring, large atrial septal defect, ventriculomegaly, hypospadias, caudal regression, polydactyly |
| C3         | White                     | F   | right     | Bochdaleck              | YES                | abdominal situs inversus                                                                                 |
| C4         | White                     | F   | left      | Bochdaleck              | NO                 | isolated CDH                                                                                             |
| C5         | White                     | F   | right     | Morgagni                | YES                | cleft palate, brachydactyly, dysmorphic features, moderate developmental delay                           |
| C6         | White                     | F   | left      | Bochdaleck              | NO                 | isolated CDH                                                                                             |
| C7         | White                     | M   | left      | Bochdaleck              | YES                | ventricular septal defect, cleft lip and palate, tethered cord, cryptorchidism                           |
| C8         | White                     | F   | left      | Bochdaleck              | NO                 | isolated CDH                                                                                             |
| C9         | White                     | M   | left      | Bochdaleck              | YES                | vascular abnormality of descending aorta                                                                 |
| C10        | White                     | M   | left      | Bochdaleck              | NO                 | isolated CDH                                                                                             |
| C11        | White                     | F   | left      | Not otherwise specified | NO                 | isolated CDH                                                                                             |
| C12        | White                     | M   | left      | Bochdaleck              | NO                 | isolated CDH                                                                                             |
| C13        | White                     | F   | left      | Bochdaleck              | YES                | ventricular septal defect                                                                                |
| C14        | White                     | M   | left      | Bochdaleck              | NO                 | isolated CDH                                                                                             |
| C15        | White                     | M   | left      | Bochdaleck              | NO                 | isolated CDH                                                                                             |
| C16        | White                     | M   | left      | Bochdaleck              | YES                | ventricular septal defect, patent foramen ovale                                                          |
| C17        | White                     | F   | left      | Bochdaleck              | NO                 | isolated CDH                                                                                             |
| C18        | White                     | M   | right     | Bochdaleck              | NO                 | isolated CDH                                                                                             |
| C19        | White                     | M   | left      | eventration             | NO                 | isolated CDH                                                                                             |
| C20        | White                     | M   | right     | Bochdaleck              | YES                | ventriculomegaly, absence of renal-hepatic inferior vena cava, 2-3 toe syndactyly                        |
| C21        | White                     | M   | left      | Bochdaleck              | NO                 | isolated CDH                                                                                             |
| C22        | White                     | M   | left      | Bochdaleck              | YES                | aortic stenosis                                                                                          |
| C23        | White                     | F   | left      | Bochdaleck              | YES                | atrial septal defect                                                                                     |
| C24        | White                     | M   | left      | Not otherwise specified | YES                | atrial septal defect                                                                                     |
| C25        | White                     | M   | left      | Bochdaleck              | NO                 | isolated CDH                                                                                             |
| C26        | Unknown                   | F   | Unknown   | Unknown                 | UNKNOWN            | limited phenotype information available                                                                  |
| C27        | Asian                     | M   | left      | Bochdaleck              | YES                | microtia, thyroglossal duct cyst, kidney abnormality, cryptorchidism                                     |
| C28        | White                     | M   | right     | Bochdaleck              | YES                | hypoplastic right pulmonary artery                                                                       |
| C29        | White                     | M   | left      | Bochdaleck              | YES                | hydrocephalus, hypotonia, left duplex kidney                                                             |
| C30        | White                     | M   | right     | Morgagni                | NO                 | isolated CDH                                                                                             |
| C31        | White                     | F   | left      | Bochdaleck              | YES                | renal cystic dysplasia                                                                                   |
| C32        | White                     | M   | left      | Bochdaleck              | YES                | macrocephaly, seizures, hydronephrosis                                                                   |
| C33        | Black                     | F   | left      | Not otherwise specified | YES                | autism, intra-uterine growth restriction, post-natal growth failure, Brown's syndrome of right eye       |
| C34        | White                     | M   | Unknown   | Unknown                 | NO                 | isolated CDH                                                                                             |
| C35        | White                     | M   | left      | Bochdaleck              | NO                 | isolated CDH                                                                                             |
| C36        | Black                     | M   | anterior  | Morgagni                | NO                 | isolated CDH                                                                                             |
| C37        | White                     | M   | left      | Bochdaleck              | NO                 | isolated CDH                                                                                             |
| C38        | White                     | M   | left      | Bochdaleck              | NO                 | isolated CDH                                                                                             |
| C39        | White                     | M   | left      | Bochdaleck              | NO                 | isolated CDH                                                                                             |
| C40        | Hispanic                  | F   | left      | Bochdaleck              | NO                 | isolated CDH                                                                                             |
| C41        | Hispanic                  | M   | right     | Bochdaleck              | NO                 | isolated CDH                                                                                             |
| C42        | White                     | F   | left      | eventration             | YES                | atrial septal defect, ventricular septal defect, persistent ductus arteriosus                            |
| C43        | White                     | M   | left      | Bochdaleck              | YES                | ventricular septal defect, persistent ductus arteriosus, ear anomaly, polydactyly                        |
| C44        | White                     | F   | left      | Morgagni                | NO                 | isolated CDH                                                                                             |
| C45        | White                     | M   | left      | Bochdaleck              | NO                 | isolated CDH                                                                                             |
| C46        | White                     | M   | left      | Bochdaleck              | NO                 | isolated CDH                                                                                             |
| C47        | White                     | F   | left      | Not otherwise specified | NO                 | isolated CDH                                                                                             |
| C48        | Asian                     | M   | left      | Bochdaleck              | NO                 | isolated CDH                                                                                             |
| C49        | White                     | M   | left      | Bochdaleck              | NO                 | isolated CDH                                                                                             |
| C50        | White                     | M   | left      | Not otherwise specified | YES                | atrial septal defect, ventricular septal defect, enlarged aortic root                                    |
| C51        | Hispanic                  | F   | left      | Not otherwise specified | YES                | ventricular septal defect, aberrant right subclavian artery                                              |
| C52        | Black                     | M   | left      | agenesis                | YES                | atrial septal defect, ventricular septal defect, hypoplastic left pulmonary artery                       |
| C53        | Unknown                   | M   | Unknown   | Unknown                 | UNKNOWN            | limited phenotype information available                                                                  |
| C54        | White                     | M   | left      | Bochdaleck              | NO                 | isolated CDH                                                                                             |
| C55        | White                     | M   | right     | Morgagni                | NO                 | isolated CDH                                                                                             |
| C56        | Unknown                   | F   | right     | Not otherwise specified | YES                | spondylocostal dysplasia, horseshoe kidney                                                               |
| C57        | Unknown                   | M   | left      | Unknown                 | NO                 | isolated CDH                                                                                             |
| C58        | White                     | F   | left      | Not otherwise specified | YES                | right microtia, bilateral hearing loss                                                                   |
| C59        | White                     | F   | right     | agenesis                | NO                 | isolated CDH                                                                                             |
| C60        | White                     | M   | left      | Unknown                 | YES                | atrial septal defect, ventricular septal defect                                                          |
| C61        | White                     | F   | left      | agenesis                | YES                | coarctation of aorta, hypoplastic genitalia, left arm reduction defect, lumbosacral vertebral anomaly    |
| C62        | White                     | M   | left      | Bochdaleck              | YES                | dysmorphic features, inguinal hernia                                                                     |
| C63        | Asian                     | F   | left      | Bochdaleck              | NO                 | isolated CDH                                                                                             |
| C64        | White                     | F   | left      | agenesis                | YES                | coarctation of aorta, atrial septal defect, hypoplastic right pulmonary artery                           |
| C65        | White                     | M   | left      | Not otherwise specified | NO                 | isolated CDH                                                                                             |
| C66        | White                     | F   | right     | Not otherwise specified | NO                 | isolated CDH                                                                                             |
| C67        | White                     | M   | left      | agenesis                | NO                 | isolated CDH                                                                                             |
| C68        | Hispanic                  | F   | left      | lateral                 | NO                 | isolated CDH                                                                                             |
| C69        | White                     | M   | left      | Unknown                 | YES                | developmental delay, hypotonia, persistent ductus arteriosus, decreased visual acuity, hypertelorism     |
| C70        | White                     | M   | Unknown   | Unknown                 | YES                | ventricular septal defect                                                                                |
| C71        | White                     | M   | right     | eventration             | YES                | developmental delay, hepatopulmonary fusion, sacral dimple, ankyloglossia                                |
| C72        | White                     | M   | left      | Bochdaleck              | YES                | coarctation/hypoplastic aortic arch, absent corpus callosum, hypospadias, dysmorphic features            |

|      |          |         |           |                                        |         |                                                                                                                     |
|------|----------|---------|-----------|----------------------------------------|---------|---------------------------------------------------------------------------------------------------------------------|
| C73  | White    | M       | central   | Unknown                                | NO      | isolated CDH                                                                                                        |
| C74  | White    | F       | left      | Bochdaleck                             | YES     | dysmorphic features                                                                                                 |
| C75  | Unknown  | F       | left      | Bochdaleck                             | NO      | isolated CDH                                                                                                        |
| C76  | White    | F       | left      | agenesis                               | YES     | interrupted inferior vena cava with azygous continuation                                                            |
| C77  | White    | M       | left      | Bochdaleck                             | NO      | isolated CDH                                                                                                        |
| C78  | Unknown  | F       | left      | Bochdaleck                             | NO      | isolated CDH                                                                                                        |
| C79  | Unknown  | F       | left      | agenesis                               | YES     | Fryns syndrome (polyhydramnios, hydronephrosis/hydronephrosis, cleft lip and palate, right external oblique hernia) |
| C80  | White    | M       | right     | Bochdaleck                             | NO      | isolated CDH                                                                                                        |
| C81  | White    | M       | left      | Bochdaleck                             | NO      | isolated CDH                                                                                                        |
| C82  | White    | F       | left      | Bochdaleck                             | YES     | coarctation of aorta, atrial septal defect                                                                          |
| C83  | Black    | M       | left      | Bochdaleck                             | NO      | isolated CDH                                                                                                        |
| C84  | B/Al     | F       | right     | Bochdaleck                             | NO      | isolated CDH                                                                                                        |
| C85  | White    | F       | left      | Bochdaleck                             | NO      | isolated CDH                                                                                                        |
| C86  | White    | M       | left      | Bochdaleck                             | YES     | seizures, partial agenesis of corpus callosum, dysmorphic features                                                  |
| C87  | White    | M       | central   | Morgagni                               | YES     | Pentalogy of Cantrell (ectopia cordis, omphalocele, renal ectopia)                                                  |
| C88  | Asian    | M       | left      | Bochdaleck                             | NO      | isolated CDH                                                                                                        |
| C89  | White    | M       | left      | Unknown                                | YES     | bilateral sensorineural hearing loss treated with cochlear implants, radioulnar synostosis                          |
| C90  | White    | M       | left      | Bochdaleck                             | NO      | isolated CDH                                                                                                        |
| C91  | Unknown  | M       | left      | Bochdaleck                             | NO      | isolated CDH                                                                                                        |
| C92  | White    | M       | left      | Bochdaleck                             | NO      | isolated CDH                                                                                                        |
| C93  | Hispanic | M       | left      | Bochdaleck                             | YES     | autism                                                                                                              |
| C94  | Unknown  | M       | left      | agenesis                               | NO      | isolated CDH                                                                                                        |
| C95  | White    | F       | right     | Unknown                                | YES     | ventricular septal defect, mildly dilated aortic root, cholesteatoma, incisional hernia                             |
| C96  | Unknown  | M       | Unknown   | Unknown                                | UNKNOWN | limited phenotype information available                                                                             |
| C97  | White    | F       | left      | Not otherwise specified                | YES     | atrial septal defect                                                                                                |
| C98  | Unknown  | M       | Unknown   | Unknown                                | YES     | Cornelia de Lange syndrome                                                                                          |
| C99  | White    | M       | left      | Bochdaleck                             | NO      | isolated CDH                                                                                                        |
| C100 | Asian    | M       | left      | Not otherwise specified                | NO      | isolated CDH                                                                                                        |
| C101 | White    | M       | left      | lateral                                | NO      | isolated CDH                                                                                                        |
| C102 | Unknown  | F       | Unknown   | Unknown                                | UNKNOWN | limited phenotype information available                                                                             |
| C103 | Hispanic | M       | right     | Bochdaleck                             | NO      | isolated CDH                                                                                                        |
| C104 | White    | F       | left      | Bochdaleck                             | NO      | isolated CDH                                                                                                        |
| C105 | Hispanic | M       | Unknown   | Unknown                                | UNKNOWN | limited phenotype information available                                                                             |
| C106 | White    | M       | left      | Bochdaleck                             | NO      | isolated CDH                                                                                                        |
| C107 | Unknown  | F       | left      | Bochdaleck                             | YES     | atrial septal defect, corpus callosum abnormality, severe developmental delay, bilateral club feet                  |
| C108 | Unknown  | M       | left      | Bochdaleck                             | YES     | multiple minor anomalies                                                                                            |
| C109 | White    | F       | Unknown   | Unknown                                | UNKNOWN | limited phenotype information available                                                                             |
| C110 | Unknown  | M       | Unknown   | Unknown                                | UNKNOWN | limited phenotype information available                                                                             |
| C111 | Unknown  | F       | Unknown   | eventration                            | YES     | gastroschisis                                                                                                       |
| C112 | Unknown  |         |           |                                        | YES     | colobomas, dysmorphic features                                                                                      |
| C113 | Hispanic | F       | Unknown   | Unknown                                | UNKNOWN | limited phenotype information available                                                                             |
| C114 | White    | F       | bilateral | Unknown                                | NO      | isolated CDH                                                                                                        |
| C115 | White    | F       | left      | Not otherwise specified                | NO      | isolated CDH                                                                                                        |
| C116 | White    | F       | right     | Morgagni                               | Yes     | atrial septal defect, ligamentous laxity, extra renal pelvis, hypertelorism                                         |
| C117 | White    | M       | left      | Bochdaleck                             | YES     | hypospadias                                                                                                         |
| C118 | White    | M       | left      | Unknown                                | NO      | isolated CDH                                                                                                        |
| C119 | White    | F       | Unknown   | Unknown                                | YES     | hypoplastic left heart syndrome, stillbirth                                                                         |
| C120 | White    | F       | left      | Bochdaleck                             | YES     | atrial septal defect, congenital hip dysplasia (severe)                                                             |
| C121 | White    | F       | left      | Not otherwise specified                | NO      | isolated CDH                                                                                                        |
| C122 | White    | M       | left      | Morgagni/eventration                   | Yes     | umbilical hernia, bilateral hydronephrosis, multiple dysmorphic features                                            |
| C123 | White    | M       | left      | Not otherwise specified                | YES     | vesicoureteral reflux                                                                                               |
| C124 | White    | M       | Unknown   | Unknown                                | NO      | isolated CDH                                                                                                        |
| C125 | White    | M       | left      | agenesis                               | NO      | isolated CDH                                                                                                        |
| C126 | White    | M       | bilateral | Unknown                                | NO      | isolated CDH                                                                                                        |
| C127 | White    | F       | left      | other                                  | NO      | isolated CDH                                                                                                        |
| C128 | White    | M       | left      | Not otherwise specified                | YES     | laryngeal cleft, cleft palate, microcephaly, hypotonia, severe developmental delay, hypothyroidism                  |
| C129 | Mid E    | M       | left      | Not otherwise specified                | YES     | microcephaly, intellectual disability, brain malformation, dysmorphic features                                      |
| C130 | White    | M       | left      | agenesis                               | NO      | isolated CDH                                                                                                        |
| C131 | White    | M       | Unknown   | Unknown                                | YES     | microcephaly, coloboma, hyperopia                                                                                   |
| C132 | White    | M       | left      | Morgagni                               | YES     | severe scoliosis and pectus deformity, dysmorphic features                                                          |
| C133 | Unknown  | M       | Unknown   | Unknown                                | YES     | Fryns syndrome                                                                                                      |
| C134 | Unknown  | F       | left      | Bochdaleck                             | NO      | isolated CDH                                                                                                        |
| C135 | White    | F       | Unknown   | Unknown                                | YES     | microcephaly                                                                                                        |
| C136 | Unknown  | Unknown | Unknown   | Unknown                                | UNKNOWN | limited phenotype information available                                                                             |
| C137 | Hispanic | F       | Unknown   | Unknown                                | YES     | Fryns syndrome                                                                                                      |
| C138 | Unknown  | F       | Unknown   | Unknown                                | UNKNOWN | limited phenotype information available                                                                             |
| C139 | White    | F       | left      | other                                  | NO      | isolated CDH                                                                                                        |
| C140 | White    | F       | Unknown   | Unknown                                | UNKNOWN | limited phenotype information available                                                                             |
| C141 | Unknown  | F       | Unknown   | Unknown                                | UNKNOWN | limited phenotype information available                                                                             |
| C142 | Unknown  | M       | Unknown   | Unknown                                | UNKNOWN | limited phenotype information available                                                                             |
| C143 | Unknown  | F       | left      | Unknown                                | NO      | isolated CDH                                                                                                        |
| C144 | Unknown  | M       | left      | Unknown                                | UNKNOWN | limited phenotype information available                                                                             |
| C145 | White    | M       | bilateral | other (left hernia, right eventration) | YES     | anterior body wall defect (diastasis recti, short cleft sternum)                                                    |
| C146 | Unknown  | F       | Unknown   | Unknown                                | UNKNOWN | multiple congenital anomalies, no additional information available                                                  |
| C147 | White    | M       | Unknown   | Morgagni                               | YES     | ventricular septal defect, coarctation of aorta, high palate, bilateral inguinal hernias, developmental delay       |
| C148 | White    | F       | Unknown   | Unknown                                | YES     | multiple anomalies (limited phenotype information)                                                                  |
| C149 | White    | F       | left      | Unknown                                | NO      | isolated CDH                                                                                                        |
| C150 | Unknown  | Unknown | Unknown   | Unknown                                | UNKNOWN | limited phenotype information available                                                                             |
| C151 | Unknown  | F       | Unknown   | Unknown                                | YES     | Rett syndrome (confirmed MECP2 mutation), colobomas                                                                 |
| C152 | White    | M       | right     | Morgagni                               | YES     | microcephaly, seizures, abnormal ears, micropenis, facial dysmorphism, optic nerve hypoplasia                       |
| C153 | Hispanic | F       | left      | Bochdaleck                             | Yes     | double outlet right ventricle, multiple dysmorphic features, hypoplastic genitalia, hypoplastic to                  |
| C154 | White    | M       | left      | Not otherwise specified                | YES     | hydronephrosis                                                                                                      |
| C155 | White    | M       | Unknown   | Unknown                                | YES     | hypospadias, cryptorchidism, Unknown androgen insensitivity syndrome                                                |
| C156 | Unknown  | M       | Unknown   | Unknown                                | YES     | Fryns syndrome (CDH, TOF, abnormal fingers and toes)                                                                |
| C157 | White    | M       | left      | eventration                            | NO      | isolated CDH                                                                                                        |
| C158 | Unknown  | M       | Unknown   | Unknown                                | UNKNOWN | limited phenotype information available                                                                             |
| C159 | White    | M       | right     | Unknown                                | NO      | isolated CDH                                                                                                        |
| C160 | White    | M       | left      | Bochdaleck                             | NO      | isolated CDH                                                                                                        |
| C161 | White    | F       | left      | Unknown                                | NO      | isolated CDH                                                                                                        |
| C162 | White    | M       | left      | Unknown                                | NO      | isolated CDH                                                                                                        |

|      |             |         |         |                         |         |                                                                                             |
|------|-------------|---------|---------|-------------------------|---------|---------------------------------------------------------------------------------------------|
| C163 | Unknown     | F       | Unknown | Unknown                 | UNKNOWN | limited phenotype information available                                                     |
| C164 | White       | M       | left    | Bochdaleck              | NO      | isolated CDH                                                                                |
| C165 | White       | F       | left    | Bochdaleck              | YES     | atrial septal defect, patent ductus arteriosus                                              |
| C166 | Unknown     | M       | Unknown | Unknown                 | YES     | Duane radial ray anomaly                                                                    |
| C167 | White       | M       | left    | Not otherwise specified | YES     | GI anomaly, adrenal insufficiency                                                           |
| C168 | Unknown     | M       | Unknown | Unknown                 | YES     | imperforate anus                                                                            |
| C169 | White       | F       | Right   | Bochdaleck              | Yes     | Small atrial septal defect, left pulmonary artery steNot otherwise specifiedis              |
| C170 | Unknown     | M       | left    | Unknown                 | NO      | isolated CDH                                                                                |
| C171 | White       | M       | left    | Unknown                 | NO      | isolated CDH                                                                                |
| C172 | White       | M       | right   | Morgagni                | NO      | isolated CDH                                                                                |
| C173 | White       | M       | left    | Unknown                 | YES     | atrial septal defect                                                                        |
| C174 | White       | F       | left    | Unknown                 | NO      | isolated CDH                                                                                |
| C175 | White       | M       | Unknown | Unknown                 | UNKNOWN | limited phenotype information available                                                     |
| C176 | Hispanic    | F       | left    | Bochdaleck              | NO      | isolated CDH                                                                                |
| C177 | Hispanic    | F       | right   | Bochdaleck              | NO      | isolated CDH                                                                                |
| C178 | Asian/White | F       | right   | Bochdaleck              | NO      | isolated CDH                                                                                |
| C179 | White       | F       | left    | Bochdaleck              | NO      | isolated CDH                                                                                |
| C180 | White       | M       | right   | Not otherwise specified | NO      | isolated CDH                                                                                |
| C181 | White       | M       | left    | Bochdaleck              | YES     | agenesis corpus callosum, white matter loss, cataract                                       |
| C182 | Black       | F       | left    | eventration             | NO      | isolated CDH                                                                                |
| C183 | Unknown     | F       | left    | Bochdaleck              | YES     | hypoplastic left heart syndrome                                                             |
| C184 | White       | M       | left    | Bochdaleck              | NO      | isolated CDH                                                                                |
| C185 | Asian       | M       | right   | Bochdaleck              | NO      | isolated CDH                                                                                |
| C186 | Black       | M       | left    | Bochdaleck              | NO      | isolated CDH                                                                                |
| C187 | White       | F       | left    | agenesis                | YES     | hypoplastic aortic arch, peristant left superior vena cava, 2 vessel umbilical cord         |
| C188 | White       | M       | left    | agenesis                | NO      | isolated CDH                                                                                |
| C189 | White       | M       | right   | other                   | NO      | isolated CDH                                                                                |
| C190 | White       | F       | left    | Bochdaleck              | NO      | isolated CDH                                                                                |
| C191 | White       | M       | right   | Not otherwise specified | NO      | isolated CDH                                                                                |
| C192 | White       | M       | left    | Bochdaleck              | YES     | hepatosplenomegaly, hemolytic anemia                                                        |
| C193 | Unknown     | M       | left    | Unknown                 | NO      | isolated CDH                                                                                |
| C194 | Hispanic    | F       | left    | Bochdaleck              | YES     | atrial septal defect, pulmonary vein steNot otherwise specifiedis, occipital polymicrogyria |
| C195 | White       | F       | left    | Not otherwise specified | NO      | isolated CDH                                                                                |
| C196 | Unknown     | Unknown |         |                         | UNKNOWN | limited phenotype information available, fetal sample                                       |

## Table S2. Target genes and genomic regions

### 1. Previously-published recurrent copy number variations in patients with CDH

| <u>Cyto band</u> | <u>Coordinates</u>      | <u>Candidate gene</u>                    | <u>Associated syndrome</u> |
|------------------|-------------------------|------------------------------------------|----------------------------|
| 1q21.1-q44       | chr1:1439825            | <i>CRABP2, PBX1, HMCN1, MYOG</i>         |                            |
| 2q36-qter        | chr2:221,500            | <i>EPHA4, PAX3</i>                       |                            |
| 4p16.3           | chr4:1-23366            | <i>FGFRL1</i>                            | Wolf-Hirschhorn syndrome   |
| 6p25             | chr7:1-7100000          |                                          |                            |
| 8p23.3-p22       | chr8:202262-            | <i>SOX7, GATA4, NEIL2</i>                |                            |
| 8q22.3-q24.23    | chr8:1045080            | <i>ZFPM2</i>                             |                            |
| 11q23.1-q25      | chr11:112347            | <i>HYLS1</i>                             |                            |
| 12p13.33-p11.22  | chr12:150430-28730836   |                                          | Pallister-Killian syndrome |
| 13q11-q13.1      | chr13:191680            | <i>FGF9</i>                              |                            |
| 13q21.33         | chr13:70666491-71594524 |                                          |                            |
| 15q25.2          | chr15:82635583-85055945 |                                          |                            |
| 15q26.1-qter     | chr15:891000            | <i>KIF7, NR2F2, ARRDCA, IGF1R, MEF2A</i> |                            |
| 16p11.2          | chr16:29350831-30332522 |                                          |                            |

### 2. Genes identified through human genomic studies on CDH and associated syndromes

| <u>Coordinates (hg19)</u> | <u>Candidate gene</u> | <u>Associated syndrome</u>                               |
|---------------------------|-----------------------|----------------------------------------------------------|
| chr2:169983619-170219122  | <i>LRP2</i>           | Donnai-Barrow syndrome                                   |
| chr2:189839099-189877472  | <i>COL3A1</i>         | Ehlers Danlos syndrome type IV                           |
| chr3:25469754-25639422    | <i>RARB</i>           | CDH with microphthalmia                                  |
| chr5:36876861-37065921    | <i>NIPBL</i>          | Cornelia de Lange syndrome                               |
| chr8:61591324-61780586    | <i>CHD7</i>           | CHARGE syndrome                                          |
| chr10:123237844-123356159 | <i>FGFR2</i>          | Apert syndrome                                           |
| chr15:48700503-48937985   | <i>FBN1</i>           | Marfan syndrome                                          |
| chr11:32409322-32457081   | <i>WT1</i>            | Denys-Drash, Frasier, Meacham syndromes                  |
| chr15:74471808-74502046   | <i>STRA6</i>          | Matthew-Wood syndrome                                    |
| chr17:8377523-8534079     | <i>MYH10</i>          | CDH with brain defect (case report)                      |
| chr17:42634812-42638630   | <i>FZD2</i>           | Pentalogy of Cantrell (case report)                      |
| chr18:19749404-19782491   | <i>GATA6</i>          | Familial CDH                                             |
| chr19:39989557-39999121   | <i>DLL3</i>           | Spondylocostal dysostosis                                |
| chrX:11129406-11141204    | <i>HCCS</i>           | Linear skin defects with multiple congenital anomalies 1 |
| chrX:68048840-68062006    | <i>EFNB1</i>          | Craniofrontonasal syndrome                               |
| chrX:132669776-133119673  | <i>GPC3</i>           | Simpson-Golabi-Behmel syndrome                           |

### 3. Genomic regions from unpublished studies on patients with CDH from our laboratories\*

\* preliminary copy number variation data derived from Affymetrix 6.0 SNP arrays and/or preliminary sequencing variation data derived from whole exome sequencing on multiplex families

| <u>Cyto band</u> | <u>Coordinates</u>        | <u>Candidate gene(s)</u> |
|------------------|---------------------------|--------------------------|
| 1p36.22          | chr1: 9,326,658-9,939,698 |                          |
| 3p26.1           | chr3:6651128-6653332      |                          |
| 3p22.2           | chr3:37982108-37986928    |                          |

|               |                           |
|---------------|---------------------------|
| 3q25.1        | chr3:151511085-151555731  |
| 4q13.3-q22.3  | chr4:7439112 <i>FRAS1</i> |
| 5p15.2        | chr5:12669547-12669547    |
| 6p12.3        | chr6:49431569-49447295    |
| 7p21.1        | chr1:16700447-16701844    |
| 7q34          | chr7:141757591-141784496  |
| 7q34          | chr7:142825843-142892017  |
| 7q35          | chr7:145949912-146406228  |
| 10p13         | chr10:13056263-13058840   |
| 10q23.1       | chr10:84406349-84432355   |
| 12q13.13      | chr12:52688684-52782836   |
| 14q11.2       | chr14:22889777-22978775   |
| 16p11.2-p11.1 | chr16:34459037-34757071   |
| 17p13.2       | chr17:3505485-3560005     |
| 17q12         | chr17:33682510-33758578   |
| 17q21.31      | chr17:44394412-44752300   |
| 17q25.3       | chr17:77365534-77389101   |
| 18q12.3       | chr18:40056569-40057767   |
| 19q13.42      | chr19:53938333-54015178   |
| 20q12         | chr20:41178858-41243499   |
| 20q13.12      | chr20:44350361-44378094   |
| Xp11.23       | chrX:47879024-47988177    |
| Xq23          | chrX:1147951 <i>PLS3</i>  |

#### 4. Genes that cause diaphragm defects and/or lung hypoplasia in mouse models

| <u>Coordinates (hg19)</u> | <u>Candidate gene(s)</u> |
|---------------------------|--------------------------|
| chr1:18957500-19075360    | <i>PAX7</i>              |
| chr2:121493199-121709339  | <i>GLI2</i>              |
| chr2:220283099-220291461  | <i>DES</i>               |
| chr3:78646388-79068609    | <i>ROBO1</i>             |
| chr4:55095264-55164412    | <i>PDGFRA</i>            |
| chr4:126676418-126849624  | <i>CTBP1</i>             |
| chr4:144257983-144395718  | <i>GAB1</i>              |
| chr5:44305097-44388784    | <i>FGF10</i>             |
| chr5:121398890-121414055  | <i>LOX</i>               |
| chr5:168088738-168728133  | <i>SLIT3</i>             |
| chr6:134210259-134216675  | <i>TCF21</i>             |
| chr7:42000548-42276618    | <i>GLI3</i>              |
| chr7:116312459-116438440  | <i>MET</i>               |
| chr7:155595558-155604967  | <i>SHH</i>               |
| chr8:72109668-72274467    | <i>EYA1</i>              |
| chr8:72753777-72756731    | <i>MSC</i>               |
| chr9:14734664-14910993    | <i>FREM1</i>             |
| chr10:50817141-50873150   | <i>CHAT</i>              |

|                           |               |
|---------------------------|---------------|
| chr10:126676418-126849624 | <i>CTBP2</i>  |
| chr11:2904448-2906995     | <i>CDKN1C</i> |
| chr11:17741110-17743678   | <i>MYOD1</i>  |
| chr11:65633912-65640405   | <i>EFEMP2</i> |
| chr12:114791735-114846247 | <i>TBX5</i>   |
| chr13:41048131-41185264   | <i>FOXO1</i>  |
| chr14:23305793-23316803   | <i>MMP14</i>  |
| chr14:61111417-61116155   | <i>SIX1</i>   |
| chr14:61176256-61190852   | <i>SIX4</i>   |
| chr15:56119122-56209329   | <i>NEDD4</i>  |
| chr16:55513081-55540586   | <i>MMP2</i>   |
| chr17:38474473-38513895   | <i>RARA</i>   |
| chr17:46652869-46655743   | <i>HOXB4</i>  |
| chr19:10764937-10803095   | <i>ILF3</i>   |
| chr19:12986025-12992335   | <i>DNASE2</i> |
| chr20:45523263-45817492   | <i>EYA2</i>   |
| chr21:38071991-38122510   | <i>SIM2</i>   |
| chr22:46316248-46373008   | <i>WNT7B</i>  |

**5. Prioritized candidate genes from analysis of gene expression profiles from mouse embryonic diaphragm, protein-protein interaction analyses with known CDH genes and pathways, and preliminary human genomic data**

| <u>Coordinates (hg19)</u> | <u>Candidate gene(s)</u> |
|---------------------------|--------------------------|
| chr1:23037331-23241823    | <i>EPHB2</i>             |
| chr1:32479295-32509482    | <i>KHDRBS1</i>           |
| chr2:11321778-11484711    | <i>ROCK2</i>             |
| chr2:176964530-176965488  | <i>HOXD12</i>            |
| chr2:176981492-176984670  | <i>HOXD10</i>            |
| chr2:176987413-176989645  | <i>HOXD9</i>             |
| chr2:177016113-177017949  | <i>HOXD4</i>             |
| chr3:47627378-47823405    | <i>SMARCC1</i>           |
| chr3:89156674-89531284    | <i>EPHA3</i>             |
| chr5:92919043-92929786    | <i>NR2F1</i>             |
| chr5:106712590-107006596  | <i>EFNA5</i>             |
| chr6:90539619-90584155    | <i>CASP8AP2</i>          |
| chr6:93949740-94129300    | <i>EPHA7</i>             |
| chr7:19155091-19157295    | <i>TWIST1</i>            |
| chr7:27139973-27142394    | <i>HOXA2</i>             |
| chr7:27180671-27183287    | <i>HOXA5</i>             |
| chr7:27193338-27196296    | <i>HOXA7</i>             |
| chr7:27202057-27205149    | <i>HOXA9</i>             |
| chr7:27220776-27224835    | <i>HOXA11</i>            |
| chr7:73442427-73484236    | <i>ELN</i>               |
| chr7:83587659-83824217    | <i>SEMA3A</i>            |

|                           |                |
|---------------------------|----------------|
| chr7:148504464-148581441  | <i>EZH2</i>    |
| chr7:156797547-156803347  | <i>MNX1</i>    |
| chr8:28351722-28431785    | <i>FZD3</i>    |
| chr8:41119476-41166990    | <i>SFRP1</i>   |
| chr8:49830239-49833999    | <i>SNAI2</i>   |
| chr10:72972292-73062635   | <i>UNC5B</i>   |
| chr10:96305574-96361856   | <i>HELLS</i>   |
| chr10:98757795-98945683   | <i>SLIT1</i>   |
| chr10:102986733-102988717 | <i>LBX1</i>    |
| chr11:45950870-46142985   | <i>PHF21A</i>  |
| chr11:46402334-46405387   | <i>MDK</i>     |
| chr12:48366748-48398285   | <i>COL2A1</i>  |
| chr12:66218240-66360071   | <i>HMGA2</i>   |
| chr12:85674036-85695561   | <i>ALX1</i>    |
| chr14:24630422-24635774   | <i>IRF9</i>    |
| chr15:37183222-37393500   | <i>MEIS2</i>   |
| chr17:7788123-7816075     | <i>CHD3</i>    |
| chr18:3412072-3458406     | <i>TGIF1</i>   |
| chr19:4360364-4400565     | <i>SH3GL1</i>  |
| chr19:4909510-4962165     | <i>UHRF1</i>   |
| chr19:14491956-14519537   | <i>CD97</i>    |
| chr19:16435651-16438339   | <i>KLF2</i>    |
| chr20:22561642-22565101   | <i>FOXA2</i>   |
| chr20:46286150-46415360   | <i>SULF2</i>   |
| chr21:36160098-36421595   | <i>RUNX1</i>   |
| chrX:128580478-128657460  | <i>SMARCA1</i> |

**Table S3. Summary of CNVs detected from 1,292 samples**

|                            | No. of samples | Gains | Losses |
|----------------------------|----------------|-------|--------|
| <b>Patients with CDH</b>   | 196            | 85    | 182    |
| <b>CDH parents</b>         | 109            | 49    | 144    |
| <b>Population Controls</b> | 987            | 192   | 390    |
| <b>Total</b>               | 1,292          | 234   | 437    |



**Table S4. Significant CNVs detected in multiple patients with CDH - with phenotype and inheritance information**

| Region (hg19)                                                                                                          | Size (bp) | Cyto-band | CNV Type | Number of samples affected |                     | p-value  | Description/Gene(s)                                                                                                                                                                                                      | Patient/Phenotype                                                                                                                                                                                    | Inheritance                                            |
|------------------------------------------------------------------------------------------------------------------------|-----------|-----------|----------|----------------------------|---------------------|----------|--------------------------------------------------------------------------------------------------------------------------------------------------------------------------------------------------------------------------|------------------------------------------------------------------------------------------------------------------------------------------------------------------------------------------------------|--------------------------------------------------------|
|                                                                                                                        |           |           |          | Pro-band (n=196)           | Pop-ulation (n=987) |          |                                                                                                                                                                                                                          |                                                                                                                                                                                                      |                                                        |
| <b>1) CNVs detected in two or more patients but not in population controls</b>                                         |           |           |          |                            |                     |          |                                                                                                                                                                                                                          |                                                                                                                                                                                                      |                                                        |
| 1:221052740-221054346                                                                                                  | 1,606     | 1q41      | Gain     | 5                          | 0                   | 0.00058* | most of exon 1 and part of intron 1 of the <i>HLX</i> gene, as well as non-coding RNA gene <i>HLX-AS1</i>                                                                                                                | Pt. C72: coarctation/hypoplastic aortic arch, absent corpus callosum, hypospadias, dysmorphisms<br>Pt. C41: isolated CDH<br>Pt. C80: isolated CDH<br>Pt. C81: isolated CDH<br>Pt. C131: isolated CDH | unknown<br>unknown<br>unknown<br>unknown               |
| 17:34813719-36278623                                                                                                   | 1,464,904 | 17q12     | Loss     | 2                          | 0                   | 0.06     | <i>AATF</i> , <i>ACACA</i> , <i>DDX52</i> , <i>DUSP14</i> , <i>GGNBP2</i> , <i>HNF1B</i> , <i>LHX1</i> , <i>MYO19</i> , <i>DHRS11</i> , <i>MRM1</i> , <i>c17orf78</i> , <i>PIGW</i> , <i>SYNRG</i> , <i>TADA2A</i> , and | Pt. C29: hydrocephalus, hypotonia, duplex kidney, pectus excavatum<br>Pt. C161: isolated CDH                                                                                                         | unknown<br>unknown                                     |
| 1:249126046-249238916                                                                                                  | 112,870   | 1q44      | Loss     | 3                          | 0                   | 0.016*   | <i>ZNF672</i> , <i>ZNF692</i> , and <i>PGBD2</i> (overlaps terminal region of 1q21.1-q44 duplication)                                                                                                                    | Pt. C112: colobomas<br>Pt. C139: isolated CDH<br>Pt. C151: colobomas, dev delay (pt also has Rett syndrome w/ confirmed MECP2 mutation)                                                              | unknown<br><i>de novo</i><br>unknown                   |
| <b>2) CNVs found in multiple patients with CDH but at frequency higher than ethnically matched control populations</b> |           |           |          |                            |                     |          |                                                                                                                                                                                                                          |                                                                                                                                                                                                      |                                                        |
| 16:32403182-34759850                                                                                                   | 2,356,668 | 16p11.2   | Gain     | 4                          | 4                   | 0.047*   | <i>TP53TG3E</i> , <i>TP53TG3B</i> , <i>TP53TG3F</i> , <i>TP53TG3C</i>                                                                                                                                                    | Pt. C7: VSD, CLP, tethered cord, cryptorchidism<br>Pt. C40: isolated CDH<br>Pt. C156: Fryns syndrome (CDH, TOF, abnormal fingers and toes)<br>Pt. C133: possible Fryns syndrome                      | unknown<br><i>de novo</i><br><i>de novo</i><br>unknown |
| 4:11942-143314                                                                                                         | 131,372   | 4p16.3    | Loss     | 5                          | 1                   | 0.001**  | <i>ZNF595</i> and <i>ZNF718</i> . Overlaps with Wolf-Hirschhorn critical region.                                                                                                                                         | Pt. C123: isolated CDH<br>Pt. C151: Rett syndrome (confirmed MECP2 mutation), coloboma<br>Pt. C139: isolated CDH<br>Pt. C112: colobomas, dysmorphisms<br>Pt. C104: isolated CDH                      | unknown<br>unknown<br>inherited<br>unknown<br>unknown  |
| 5:12674767-12754177                                                                                                    | 79,410    | 5p15.2    | Loss     | 3                          | 3                   | 0.036*   | <i>LINC01194</i> (non-coding)                                                                                                                                                                                            | Pt. C19: isolated CDH<br>Pt. C34: isolated CDH<br>Pt. C129: consanguineous, microcephaly, MR, brain malform, dysmorphic                                                                              | unknown<br>unknown<br>unknown                          |

<sup>a</sup> Significance level: \* (P<0.05) and \*\* (P<0.01)

**Table S5. Pathways analysis of genes present in the significant CNVs**

| Pathways and Pathway ID                    | No. of gene | Percentage<br>(involved gene/total gene) | Fold enrich | P-value | Overlapped Genes                                               |
|--------------------------------------------|-------------|------------------------------------------|-------------|---------|----------------------------------------------------------------|
| DNA binding/ gene transcription regulation |             |                                          |             |         |                                                                |
| GO:0006355                                 | 8           | 19.05                                    | 4.47        | 0.0009  | <i>HLX, LHX1, SIM2, ZNF672, ZNF595, ZNF692, ZNHIT3, ZNF718</i> |
| GO:0003700                                 | 6           | 14.29                                    | 5.55        | 0.0027  | <i>LHX1, HNF1B, TADA2A, HNF1B, SIM2, ZNF595</i>                |
| GO:0006351                                 | 7           | 16.7                                     | 3.01        | 0.0175  | <i>HLX, HNF1B, SIM2, ZNF692, ZNF672, ZNF595, ZNF718</i>        |
| GO:0003676                                 | 5           | 11.09                                    | 3.18        | 0.0183  | <i>DDX52, ZNF595, ZNF692, ZNF718, ZNF672</i>                   |
| GO:0003677                                 | 6           | 14.29                                    | 3.18        | 0.0272  | <i>HNF1B, SIM2, ZNF692, ZNF672, ZNF595, TADA2A</i>             |
| Embryonic organ development                |             |                                          |             |         |                                                                |
| INTERPRO: IPR009057                        | 4           | 9.52                                     | 11.05       | 0.0046  | <i>HLX, TADA2A, LHX1, HNF1B</i>                                |
| INTERPRO: IPR001356                        | 3           | 7.14                                     | 10.87       | 0.0278  | <i>HLX; LHX1; HNF1B</i>                                        |
| Biotin and lipid metabolic pathways        |             |                                          |             |         |                                                                |
| GO:0004075                                 | 1           | 0.01                                     | 217.87      | 0.0046  | <i>ACACA</i>                                                   |
| KEGG:hsa00061                              | 1           | 0.01                                     | 178.95      | 0.0056  | <i>ACACA</i>                                                   |
| KEGG:hsa00563                              | 1           | 0.01                                     | 93.05       | 0.0107  | <i>PIGW</i>                                                    |

**Table S6. Sequence variants in genes from CNV regions (from 275 patients with CDH studied by WES)**

| Gene Symbol   | Chromosome | Position (hg19) | Variant type          | Transcript Variant | Protein Variant | SIFT Function Prediction | PolyPhen-2 Function Prediction | phyloP p-value | dbSNP ID  | ExAc control population frequency |
|---------------|------------|-----------------|-----------------------|--------------------|-----------------|--------------------------|--------------------------------|----------------|-----------|-----------------------------------|
| <i>HLX*</i>   | 1          | 2.21E+08        | missense              | c.1172C>A          | p.T391K         | Damaging                 | Benign                         | 0.145          | 199521070 | 0.00001655                        |
| <i>AATF</i>   | 17         | 35345955        | missense              | c.1085A>G          | p.Y362C         | Damaging                 | Probably Damaging              | 7.26E-03       |           | 0                                 |
| <i>DDX52</i>  | 17         | 35986016        | missense              | c.1061C>T          | p.A354V         | Damaging                 | Probably Damaging              | 9.68E-07       |           | 0.000008237                       |
| <i>DDX52</i>  | 17         | 35986035        | missense              | c.1042C>G          | p.R348G         | Damaging                 | Possibly Damaging              | 2.98E-03       |           | 0                                 |
| <i>DDX52</i>  | 17         | 36002175        | in-frame dup          | c.247_249dupAGG    | p.R83dup        |                          |                                |                |           | 0.0005354                         |
| <i>DDX52</i>  | 17         | 36003436        | missense              | c.14A>G            | p.D5G           | Damaging                 | Possibly Damaging              | 2.62E-03       | 140497637 | 0.0007969                         |
| <i>GNBP2</i>  | 17         | 34942587        | in-frame del          | c.1609_1611delAAG  | p.K538del       |                          |                                | 3.37E-05       |           | 0.000414                          |
| <i>MYO19</i>  | 17         | 34854121        | missense              | c.2146G>A          | p.A916T         | Damaging                 | Probably Damaging              | 1.93E-04       | 139565052 | 0                                 |
| <i>MYO19</i>  | 17         | 34861135        | splice site           | c.1905+1G>A        |                 |                          |                                | 1.04E-05       | 200572125 | 0.0001827                         |
| <i>MYO19</i>  | 17         | 34871802        | missense              | c.446A>G           | p.Y149C         | Damaging                 | Probably Damaging              | 3.05E-05       | 187710120 | 0.001402                          |
| <i>MYO19</i>  | 17         | 34871823        | missense              | c.425C>T           | p.S142F         | Damaging                 | Probably Damaging              | 3.53E-06       | 375068557 | 0.00005375                        |
| <i>DHRS11</i> | 17         | 34951458        | missense              | c.205T>A           | p.C69S          | Damaging                 | Probably Damaging              | 2.32E-05       | 143529065 | 0.008163                          |
| <i>PIGW</i>   | 17         | 34893655        | missense              | c.705C>G           | p.H235Q         | Damaging                 | Probably Damaging              | 5.37E-03       | 61755368  | 0.006977                          |
| <i>PIGW</i>   | 17         | 34893833        | missense              | c.883C>T           | p.R295W         | Damaging                 | Probably Damaging              |                | 367592728 | 0.00006599                        |
| <i>SYNRG</i>  | 17         | 35902204        | missense              | c.2835T>G          | p.F1024L        | Damaging                 | Probably Damaging              |                |           | 0.0001153                         |
| <i>SYNRG</i>  | 17         | 35937711        | missense              | c.590G>A           | p.G197D         | Damaging                 | Possibly Damaging              | 7.11E-06       |           | 0.00003319                        |
| <i>TADA2A</i> | 17         | 35787059        | missense              | c.143G>A           | p.R48Q          | Tolerated                | Possibly Damaging              | 2.87E-05       |           | 0.00002537                        |
| <i>ZNF692</i> | 1          | 249149756       | splice site           | c.974+1G>T         |                 |                          |                                |                |           | 0                                 |
| <i>PGBD2</i>  | 1          | 2.49E+08        | missense              | c.1447T>C          | p.Y483H         | Damaging                 | Probably Damaging              |                |           | 0                                 |
| <i>ZNF595</i> | 4          | 86655           | non-coding transcript | G>A                |                 |                          | Possibly Damaging              |                |           | 0.000008377                       |
| <i>ZNF595</i> | 4          | 86823           | non-coding transcript | G>A                |                 |                          | Probably Damaging              | 3.54E-04       | 373753380 | 0.0001331                         |
| <i>ZNF595</i> | 4          | 87064           | non-coding transcript | T>C                |                 |                          | Probably Damaging              |                |           | 0                                 |

\* HLX variant published previously in Longoni et al., Proc Natl Acad Sci USA 2014.Aug 26; 111(34):12450-5 (PMID: 25107291)
